# Supplementary material for: Metabolic Reprogramming of Sulfur in Hepatocellular Carcinoma and Sulfane Sulfur-Triggered Anti-Cancer Strategy
Source: PubMed Central journal article supplement (PMC7556288; doi:10.3389/fphar.2020.571143), 2020-09-25
Supplement: Image_2.pdf [file Image_2.pdf]

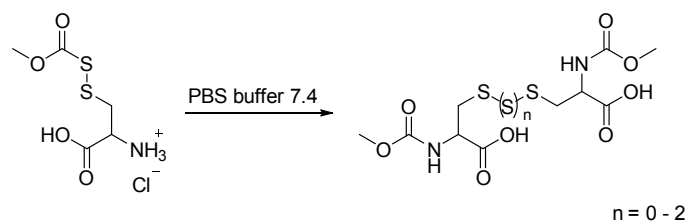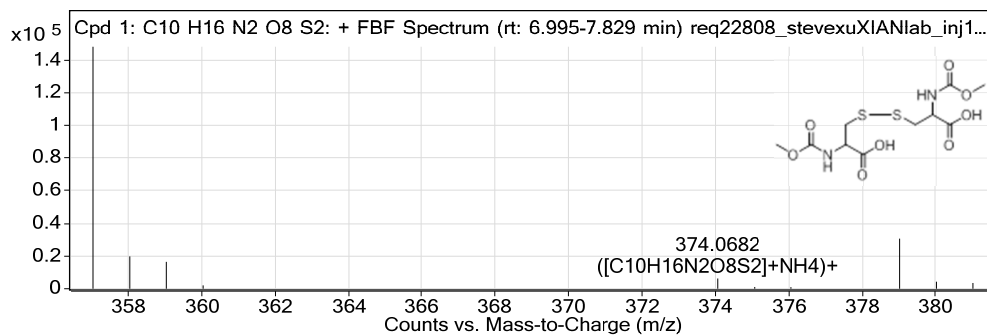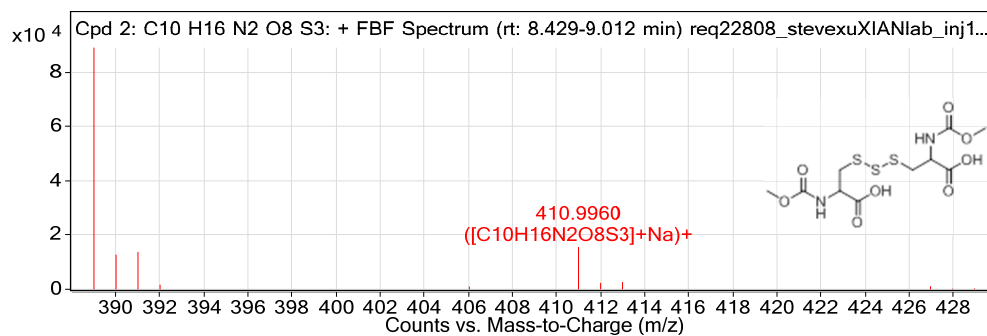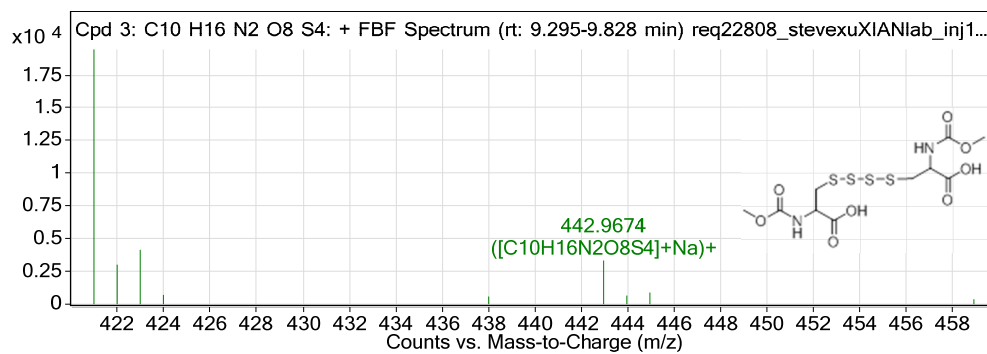

**Supplementary Figure 2** PSCP (2 mM) was dissolved in buffer (PBS, 7.4) and incubated under room temperature for 6 h. The resultant mixture was directly analyzed by MS spectrometry.
