# Supplementary material for: Metabolic Reprogramming of Sulfur in Hepatocellular Carcinoma and Sulfane Sulfur-Triggered Anti-Cancer Strategy
Source: PubMed Central journal article supplement (PMC7556288; doi:10.3389/fphar.2020.571143), 2020-09-25
Supplement: Image_3.pdf [file Image_3.pdf]

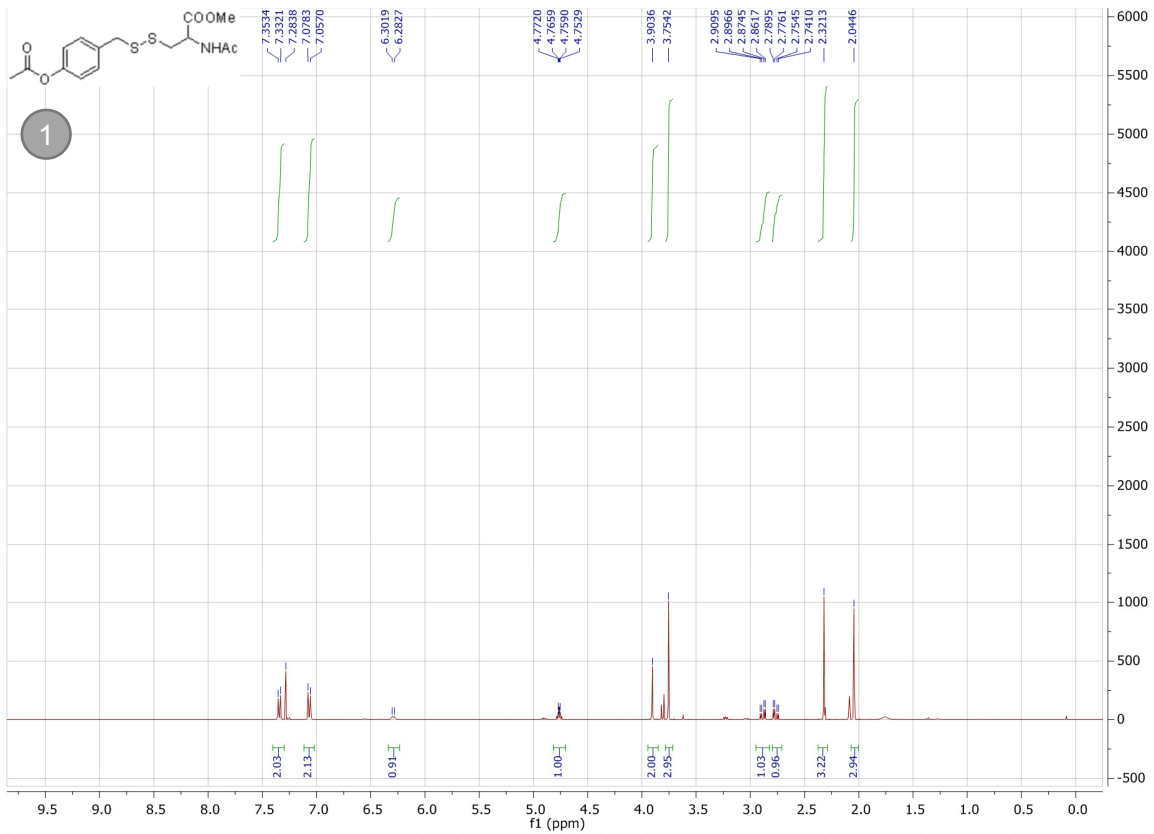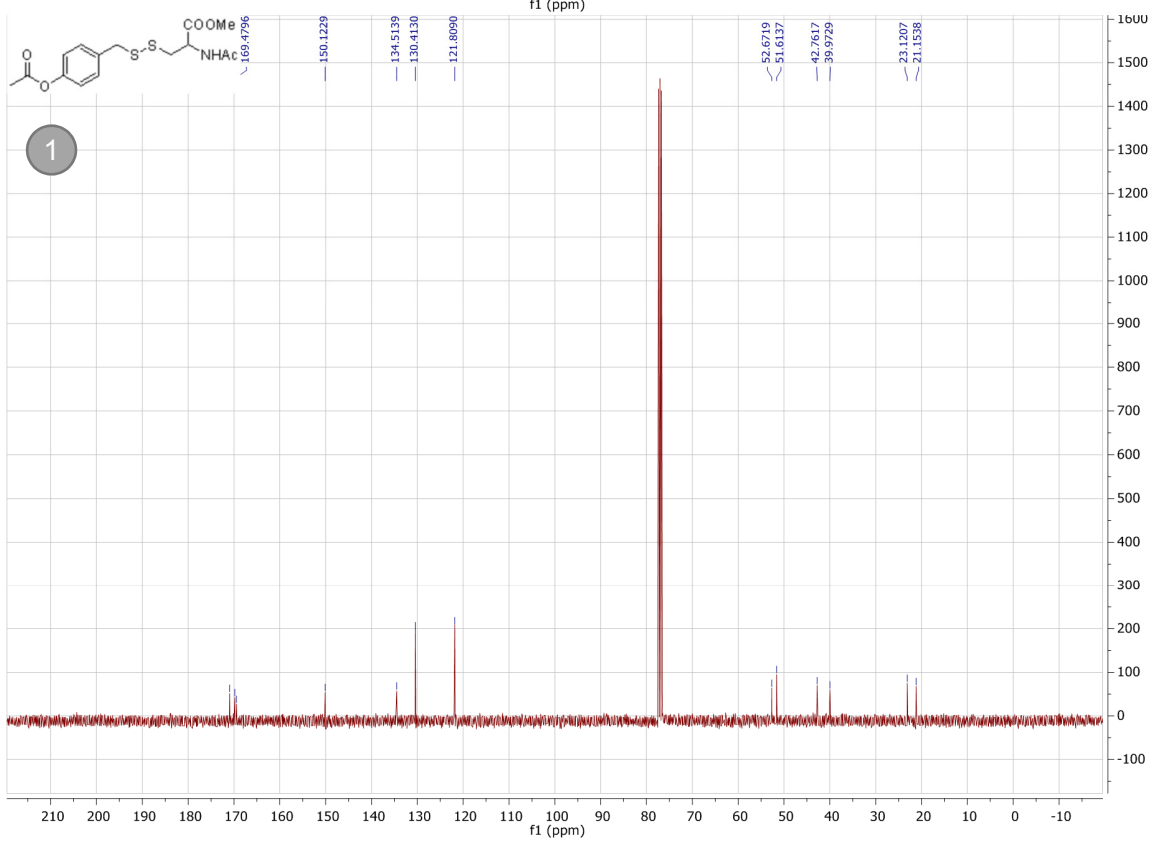

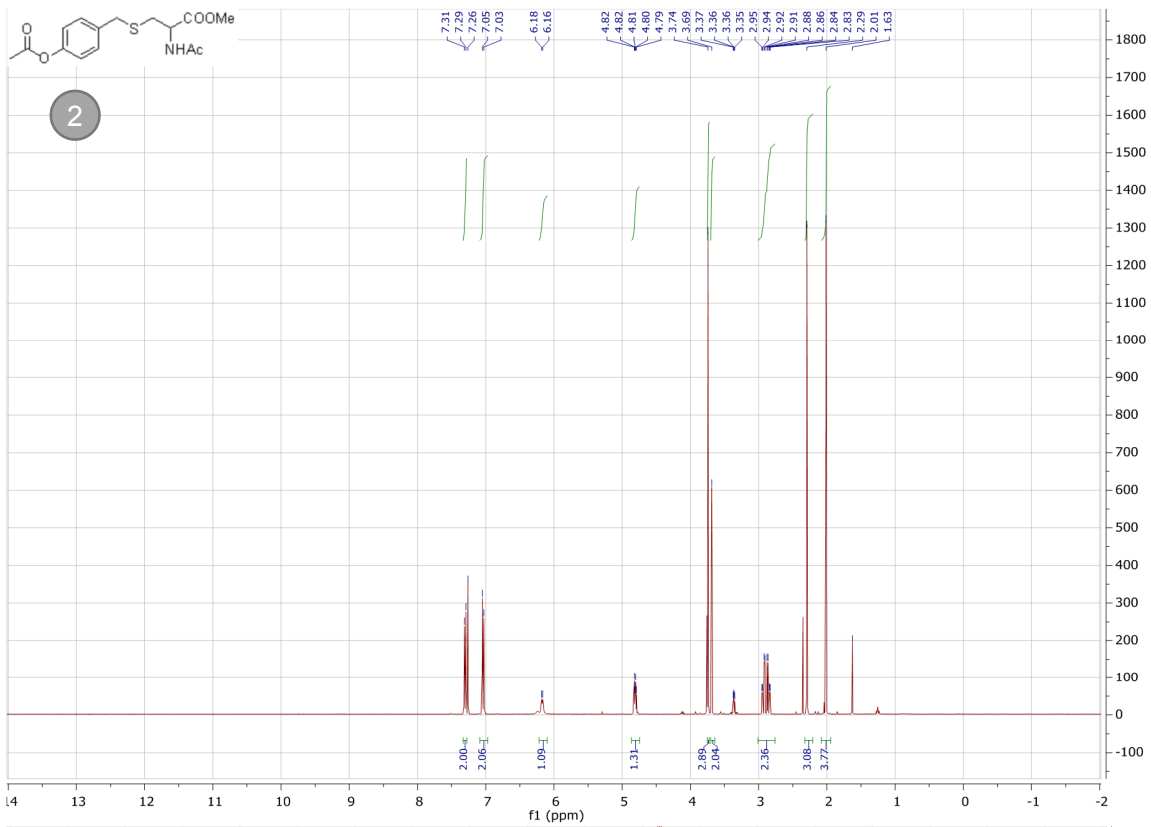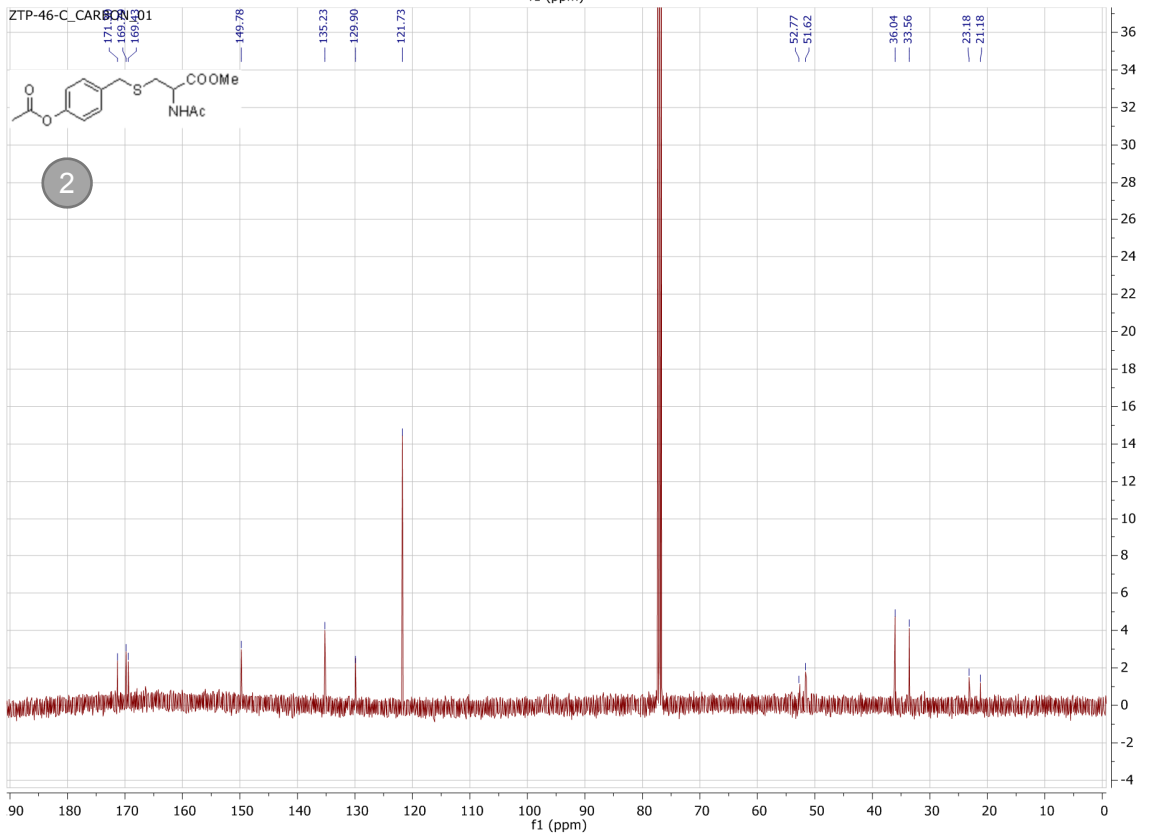

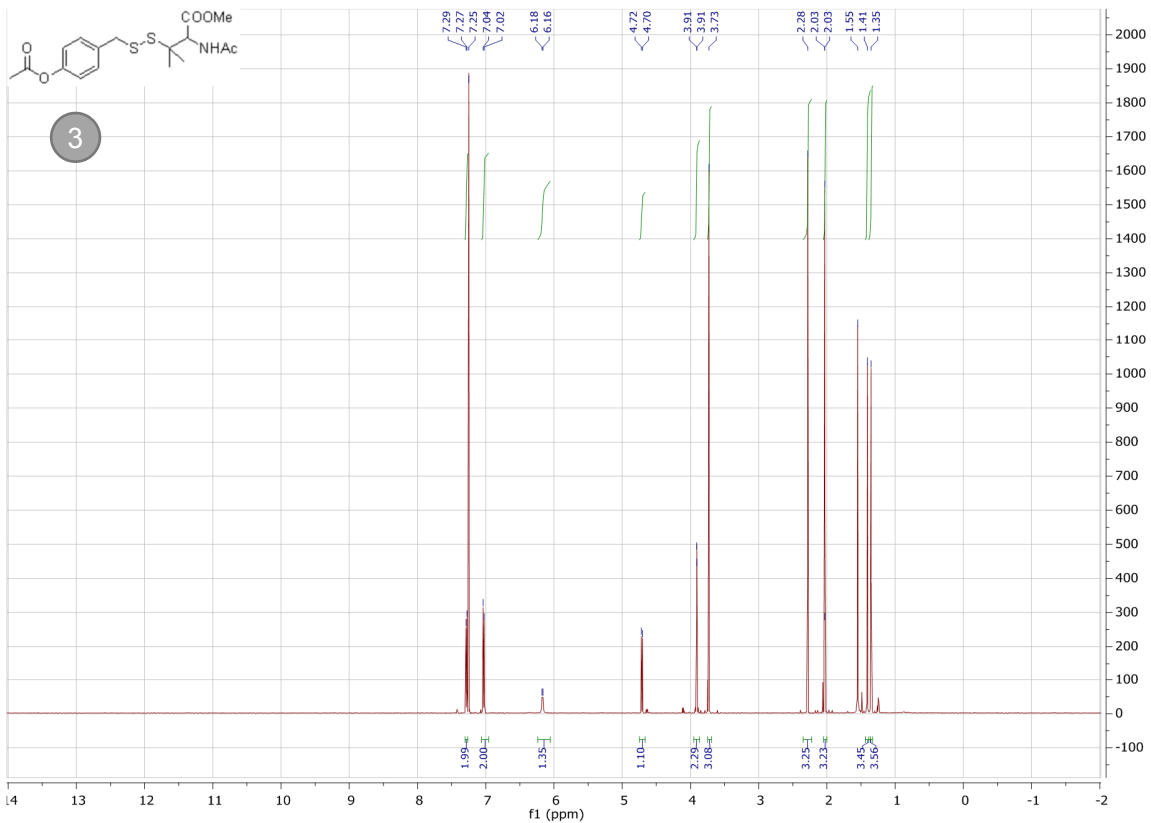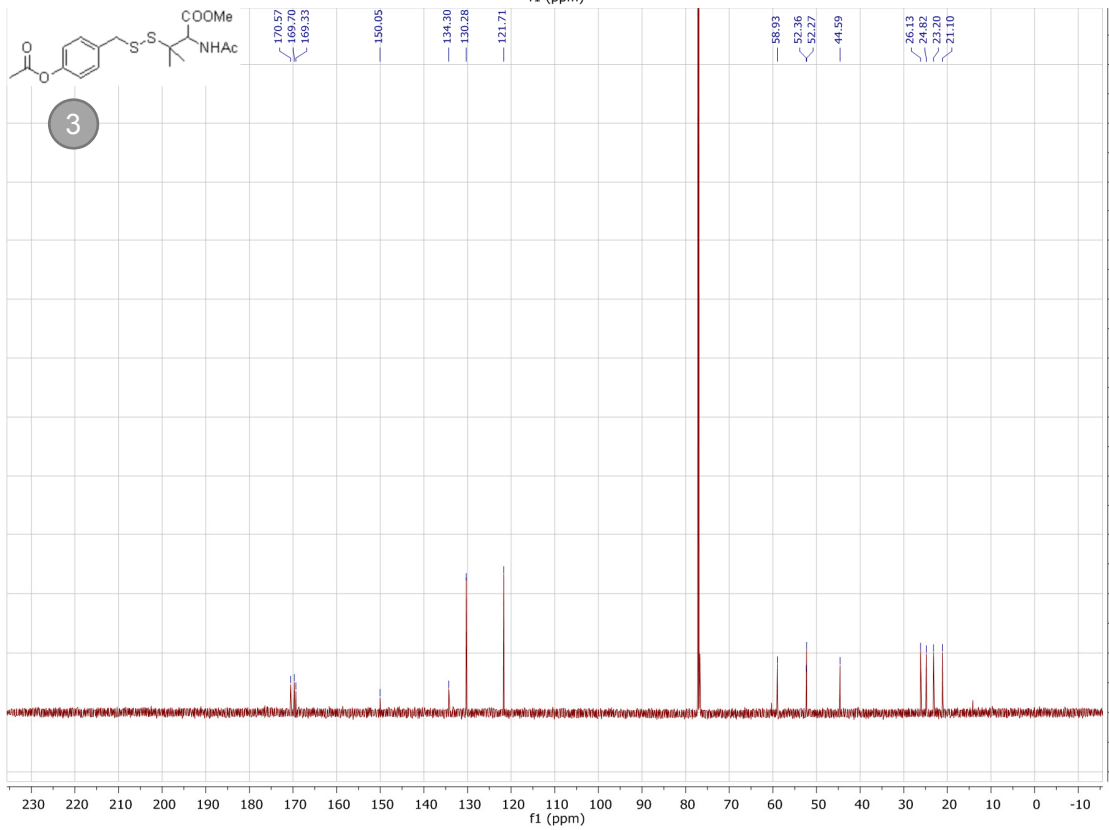

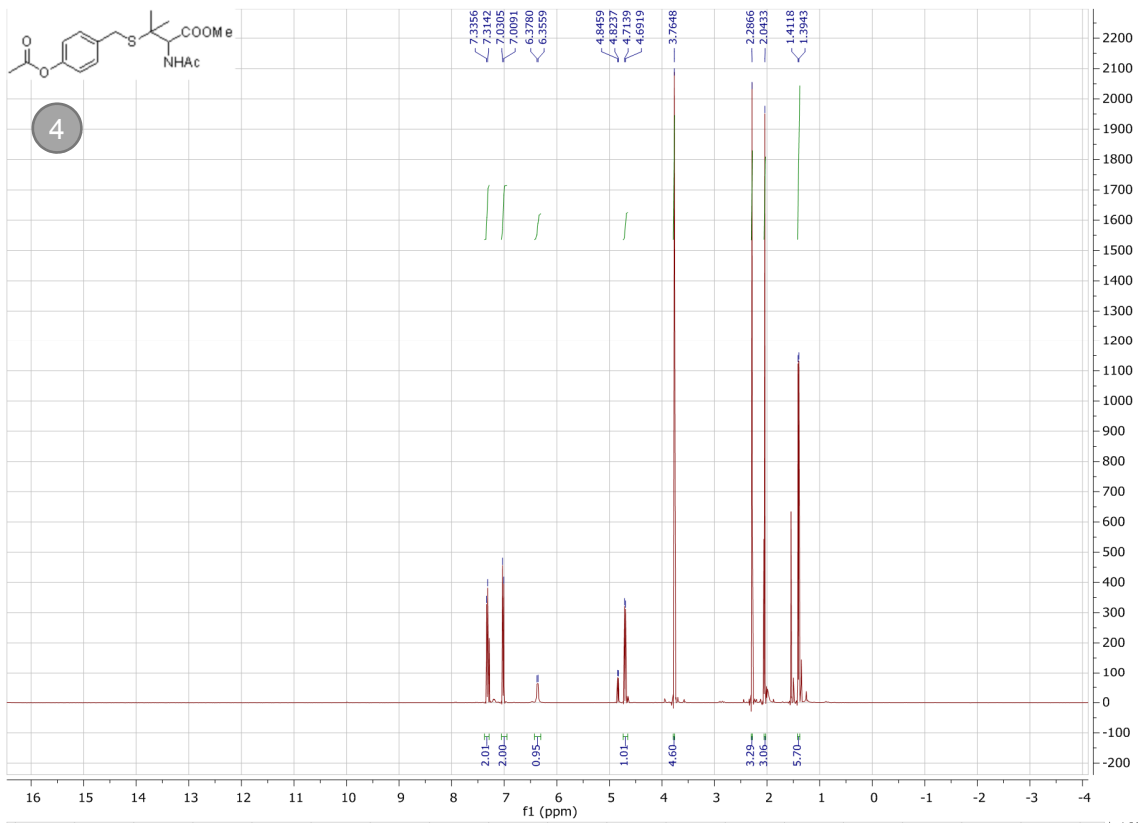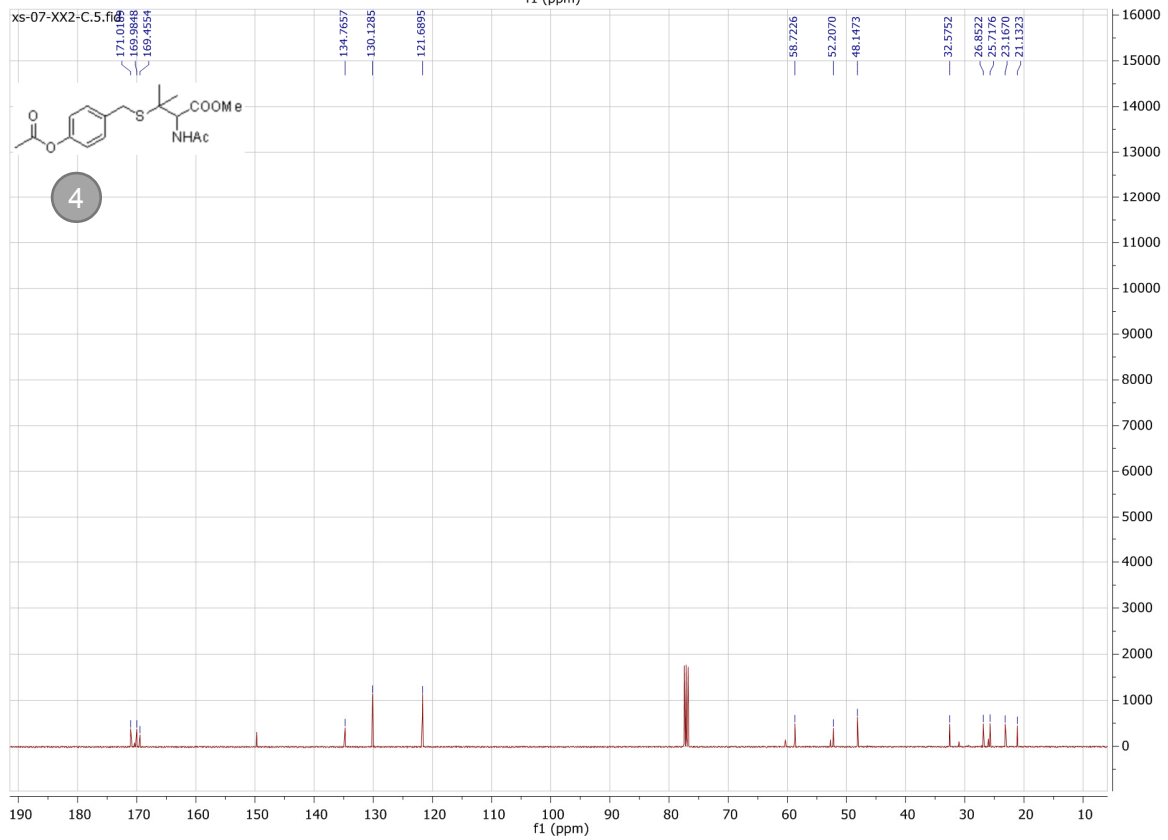

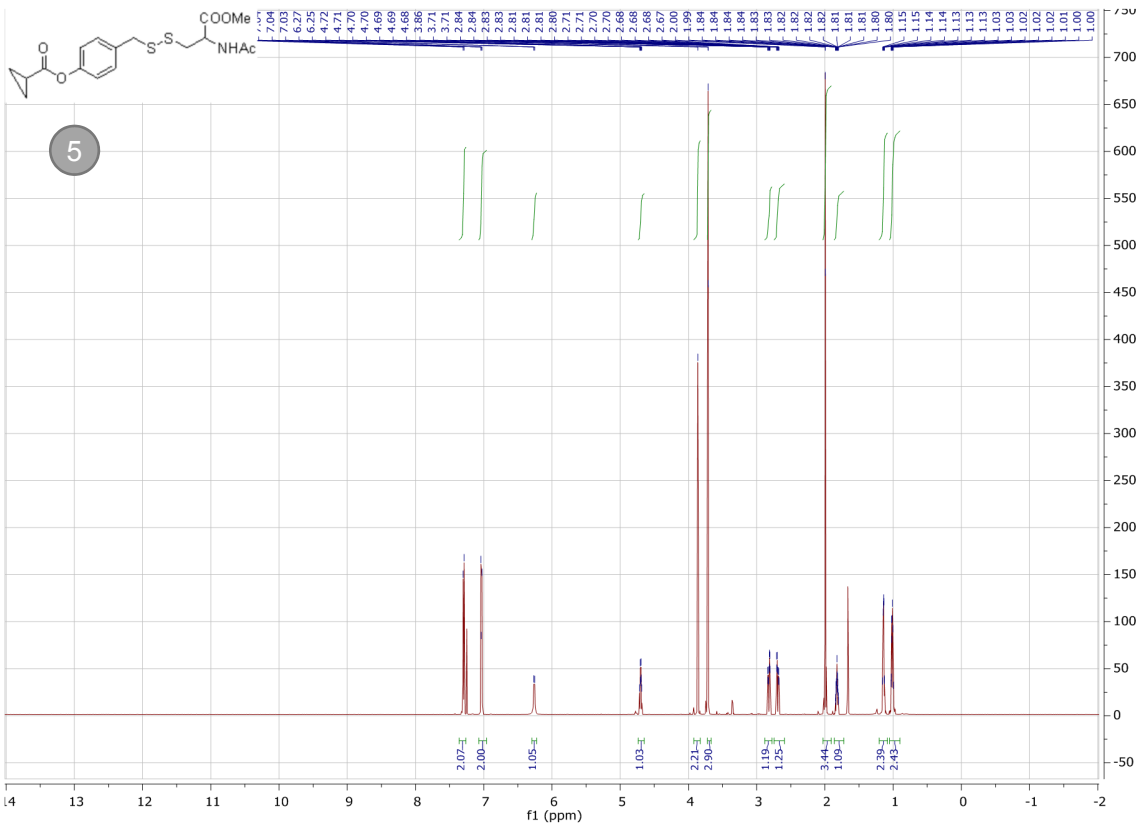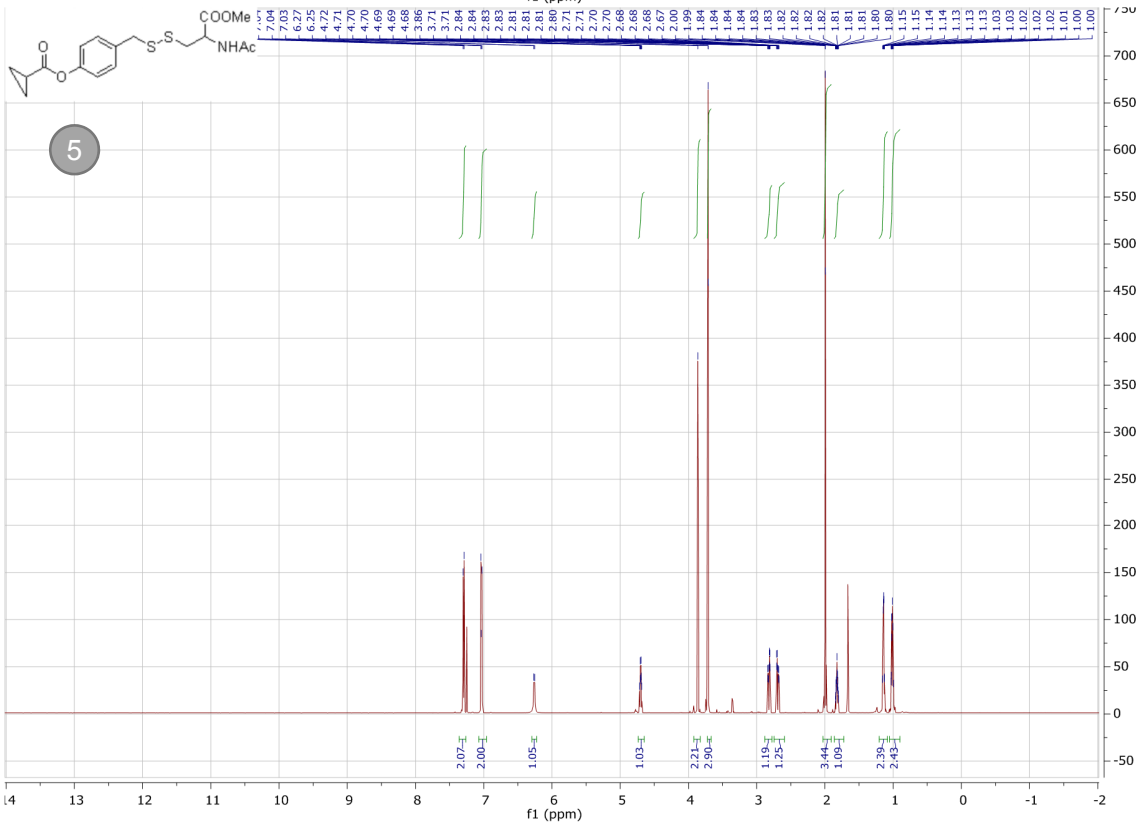

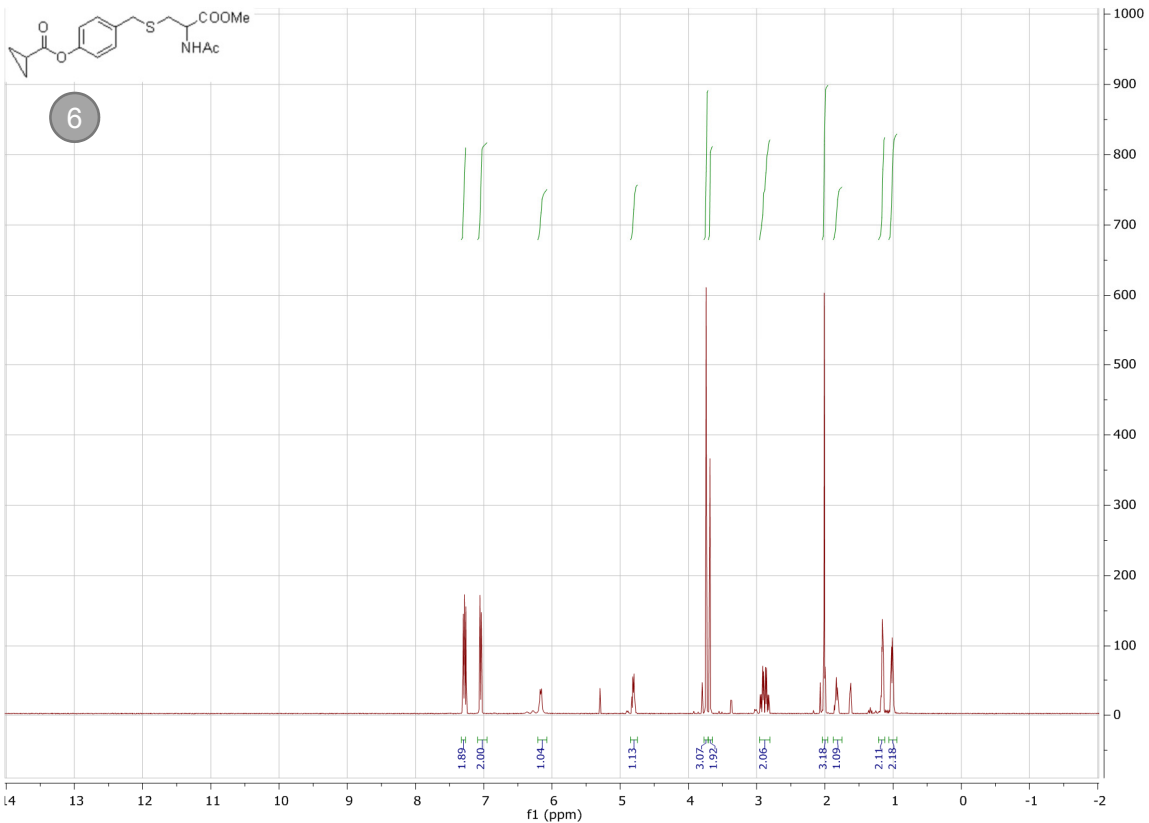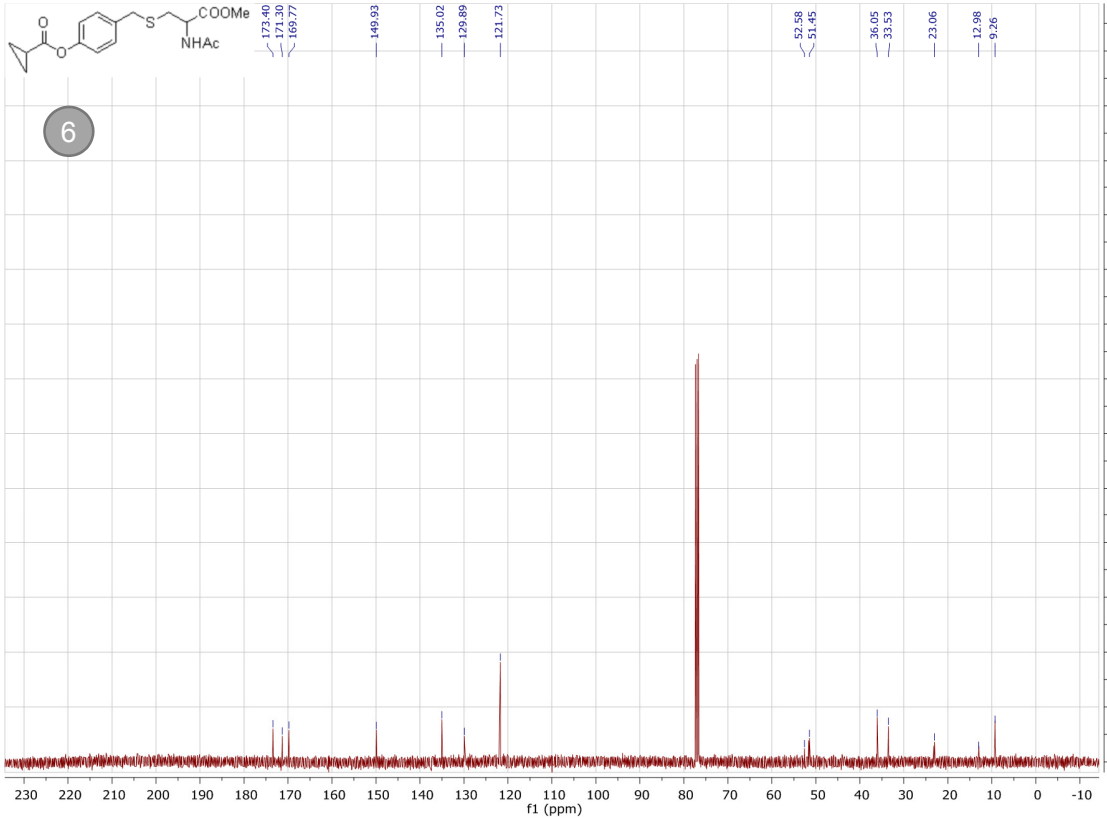

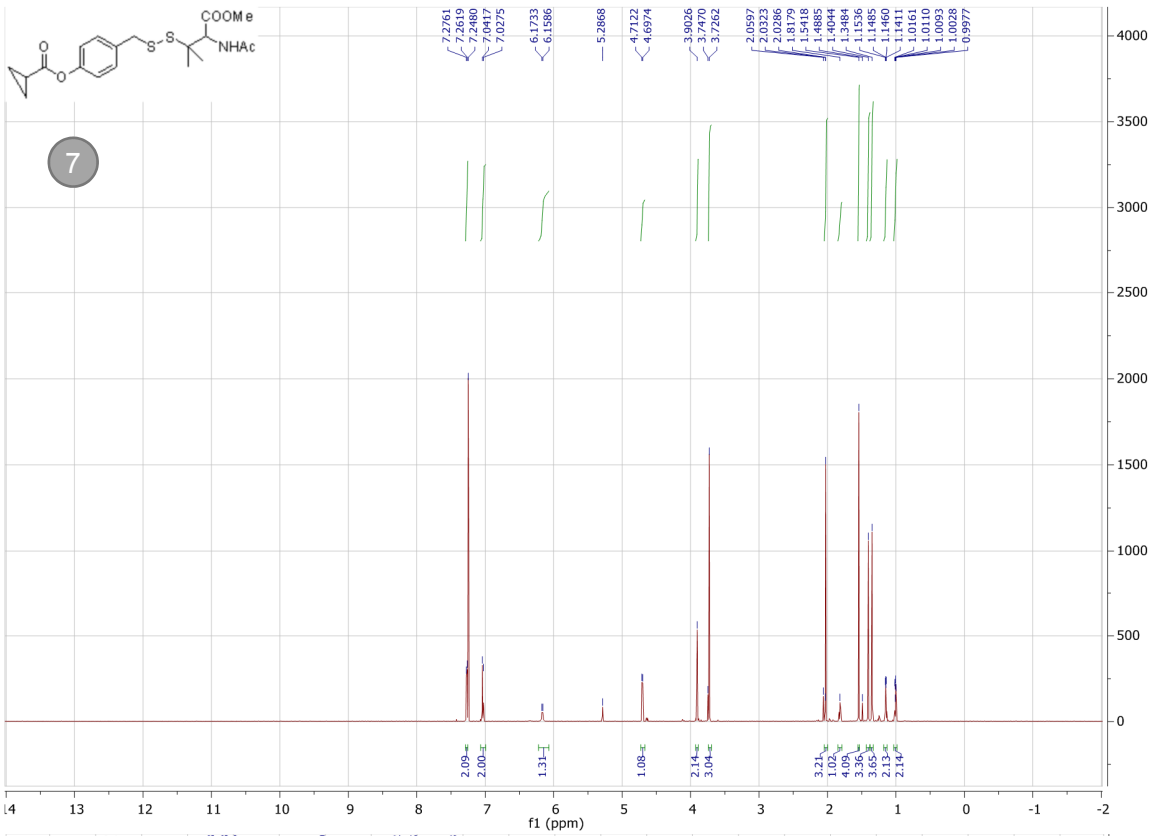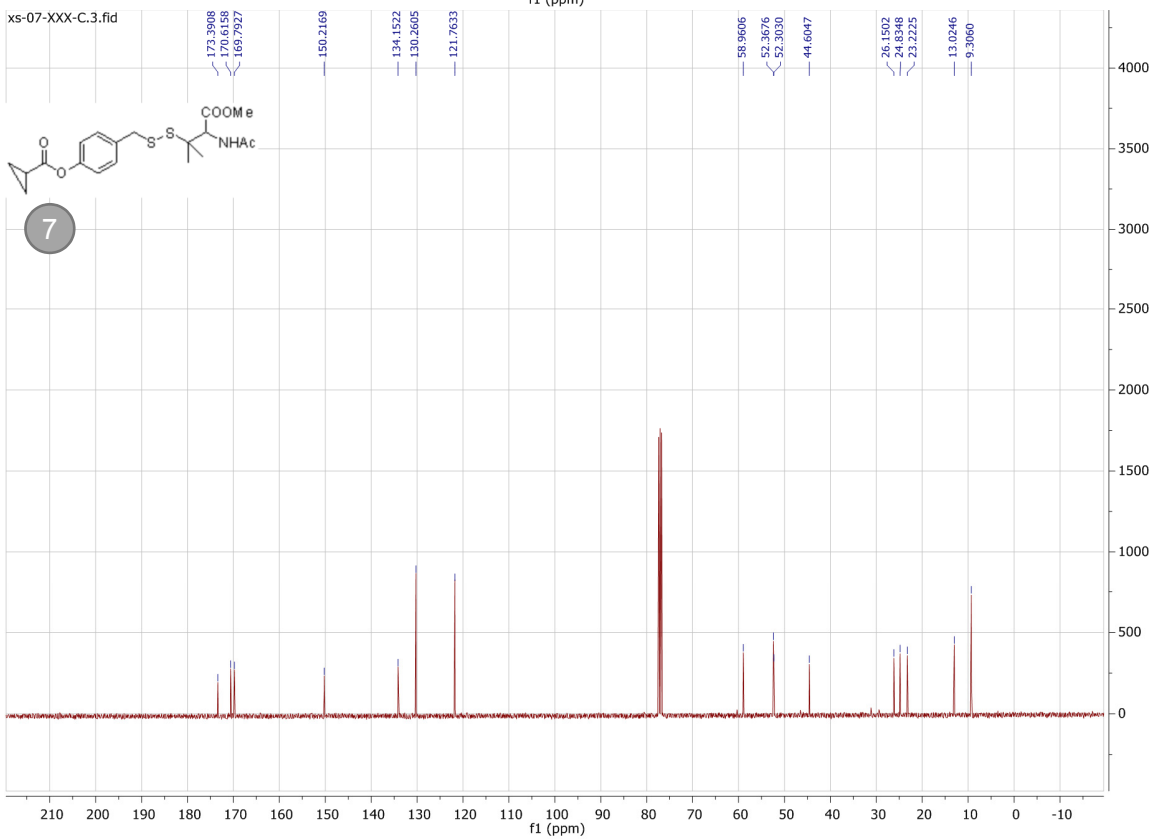

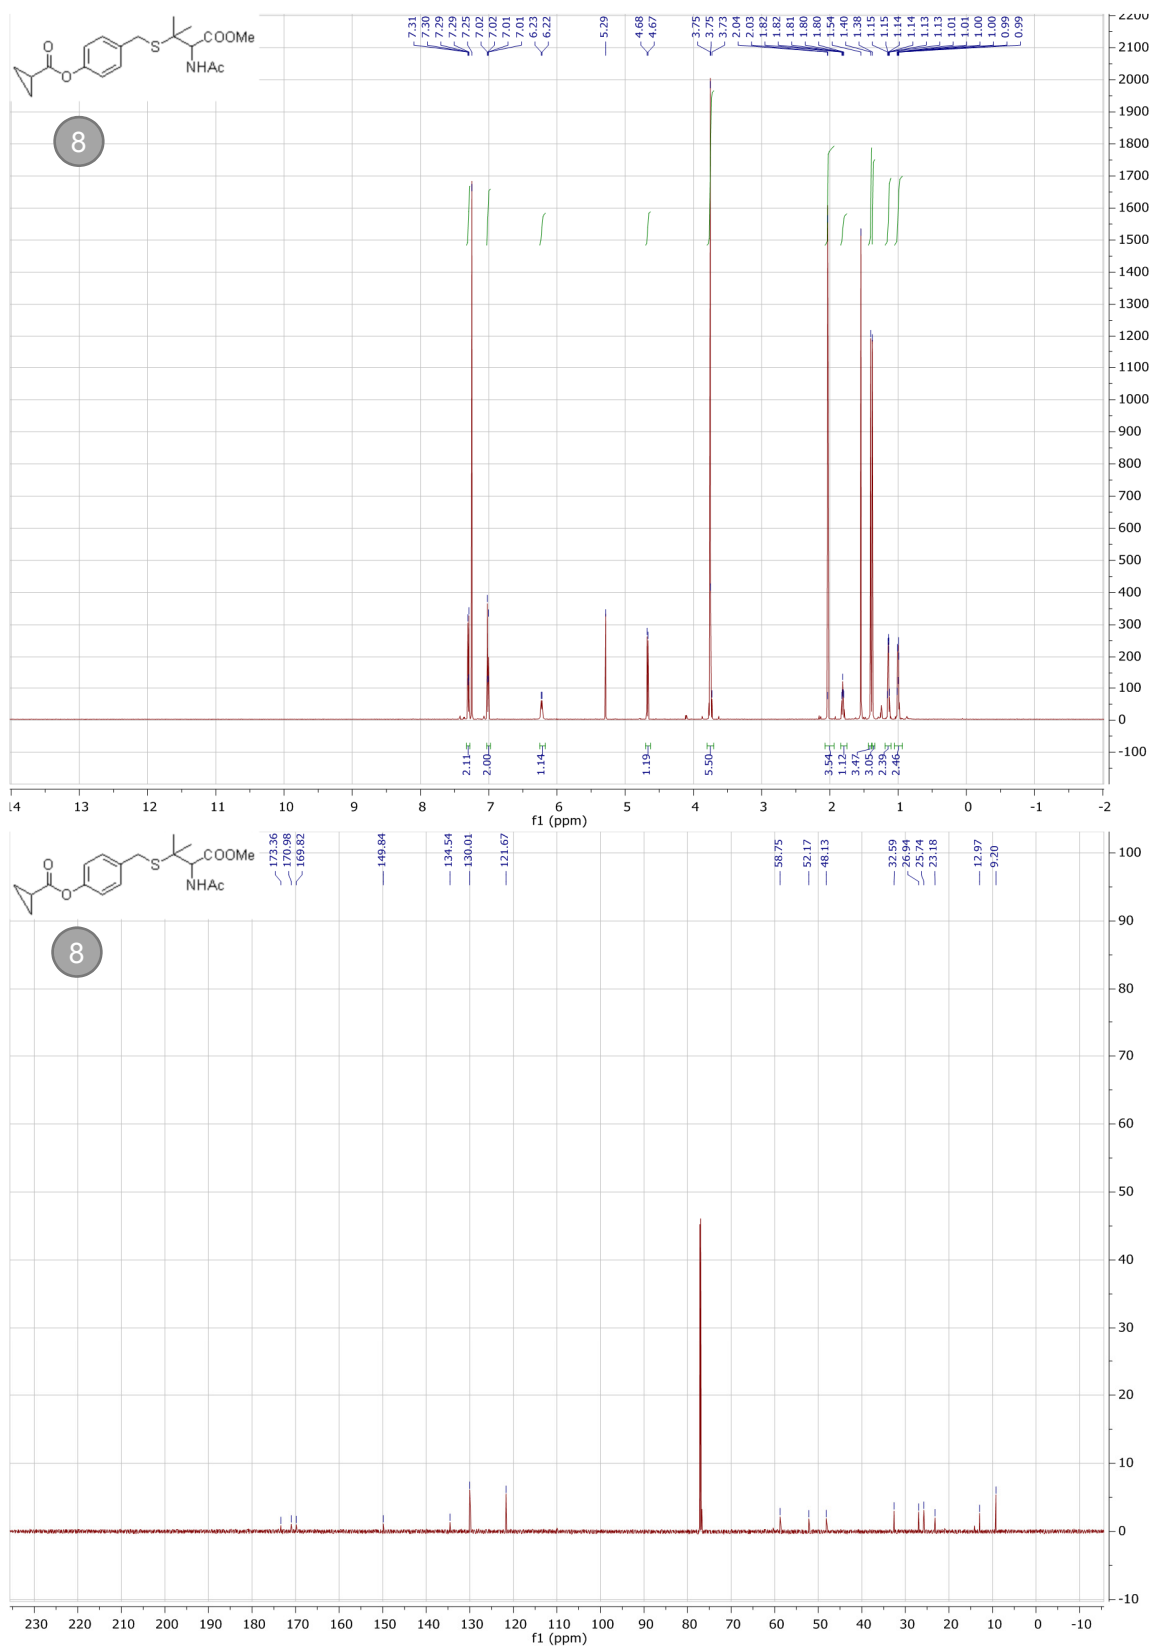

**Supplementary Figure 3** Analysis of controllable sulfane sulfur donors (1, 3 5, and 7) and their control compounds (2, 4 6, and 8) using **MS** spectrometry
